# Supplementary material for: Epidemiologic Parameters of the Middle East Respiratory Syndrome Outbreak in Korea, 2015
Source: PubMed Central journal article supplement — Infect Chemother. 2016 Jun 30;48(2):108–17. doi: 10.3947/ic.2016.48.2.108 (PMC4945720; doi:10.3947/ic.2016.48.2.108), 2016-06-30
Supplement: ic-48-108-s001.pdf [file ic-48-108-s001.pdf]

**Supplementary Table 1.** Incubation periods estimated using non-parametric and parametric methods according to the disease generation, a link to superspreaders, days of illness in source cases.

|                                        | Non-parametric Estimation | Parametric Estimation |                       |                        |
|----------------------------------------|---------------------------|-----------------------|-----------------------|------------------------|
|                                        | Median days (IQR)         | Median days (95% CI)  | 5 Percentile (95% CI) | 95 Percentile (95% CI) |
| <b>Generation</b>                      |                           |                       |                       |                        |
| 1st generation (n=28)                  | 5 (4-7)                   | 6.2 (5.4-7.0)         | 3.2 (2.6-14.0)        | 10.6 (8.3-12.7)        |
| 2nd generation (n=113)                 | 7 (5-10.5)                | 7.7 (7.0-8.4)         | 2.9 (2.50-3.4)        | 16.0 (14.3-17.7)       |
| 3rd generation (n=21)                  | 8 (5-10)                  | 7.95 (6.3-10.0)       | 2.8 (1.82-4.8)        | 17.2 (13.3-21.2)       |
| <b>Link to superspreaders</b>          |                           |                       |                       |                        |
| SSE (n=149)                            | 6 (4.5-9.5)               | 7.3 (6.7-7.9)         | 2.9 (1.69-8.7)        | 14.9 (13.4-16.4)       |
| Non-SSE (n=13)                         | 10 (8-13)                 | 9.5 (7.1-12.0)        | 3.5 (1.69-8.7)        | 19.9 (15.0-23.0)       |
| <b>Days of illness in source cases</b> |                           |                       |                       |                        |
| ≤3 days of illness (n=30)              | 9 (5.5-12)                | 8.9 (7.2-10.7)        | 3.7 (2.60-5.3)        | 21.6 (16.9-26.5)       |
| 4-6 days of illness (n=112)            | 6.75 (4.5-9.5)            | 7.3 (6.7-7.9)         | 3.0 (2.5-3.5)         | 14.5 (12.9-16.0)       |
| ≥7days of illness (n=20)               | 5 (3.26-8.5)              | 6.0 (4.8-7.3)         | 2.4 (1.9-3.4)         | 12.1 (9.1-14.6)        |

IQR, interquartile range; CI, confidence interval; SSE, superspreading events.
